# Supplementary material
Source: MDPI journal article supplement (https://www.mdpi.com/2076-3417/13/9/5445)
Supplement: s1 [file s1]

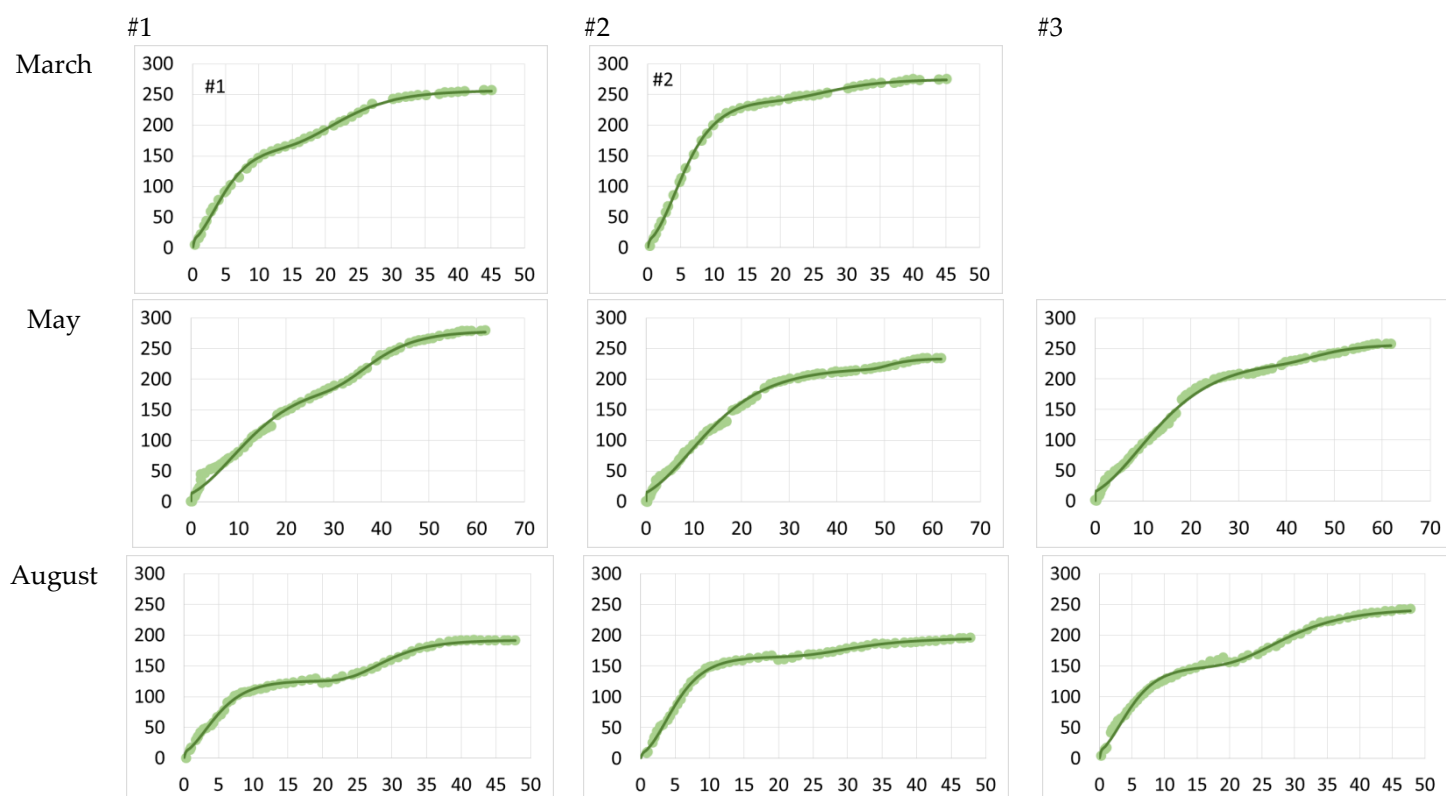

**Figure S1.** Replicate BMP curves of samples from tomato leaves. Dots: experimental methane yield expressed in NL kgVS<sup>-1</sup>, solid lines: TGM.

**Table S1.** Parameter values of the TGM fitting the BMP curves of samples from tomato leaves.

|        |    | $A_1$<br>(L kg <sup>-1</sup> VS) | $\lambda_1$<br>(d) | $\mu_{max1}$<br>(L kg <sup>-1</sup> d <sup>-1</sup> ) | $A_2$<br>(L kg <sup>-1</sup> VS) | $\lambda_2$<br>(d) | $\mu_{max2}$<br>(L kg <sup>-1</sup> d <sup>-1</sup> ) | R <sup>2</sup> | NSE  | PBIAS |
|--------|----|----------------------------------|--------------------|-------------------------------------------------------|----------------------------------|--------------------|-------------------------------------------------------|----------------|------|-------|
| March  | #1 | 168                              | 0.0                | 19.0                                                  | 89                               | 15                 | 5.9                                                   | 0.999          | 1.00 | 0.08  |
|        | #2 | 242                              | 0.6                | 25.7                                                  | 33                               | 21.1               | 2.3                                                   | 1.000          | 1.00 | -0.01 |
| May    | #1 | 197                              | 0.0                | 8.4                                                   | 82                               | 30.5               | 4.8                                                   | 0.998          | 0.99 | 0.70  |
|        | #2 | 220                              | 0.0                | 8.8                                                   | 14                               | 47.7               | 1.9                                                   | 0.998          | 1.00 | 0.27  |
|        | #3 | 231                              | 0.0                | 9.3                                                   | 25                               | 40.1               | 1.7                                                   | 0.998          | 1.00 | -0.01 |
| August | #1 | 126                              | 0.0                | 14.7                                                  | 66                               | 23.5               | 5.7                                                   | 0.998          | 1.00 | 0.25  |
|        | #2 | 165                              | 0.6                | 19.9                                                  | 30                               | 23.3               | 1.9                                                   | 0.999          | 1.00 | -0.06 |
|        | #3 | 149                              | 0.0                | 17.3                                                  | 94                               | 20.0               | 5.3                                                   | 0.997          | 0.99 | 0.50  |

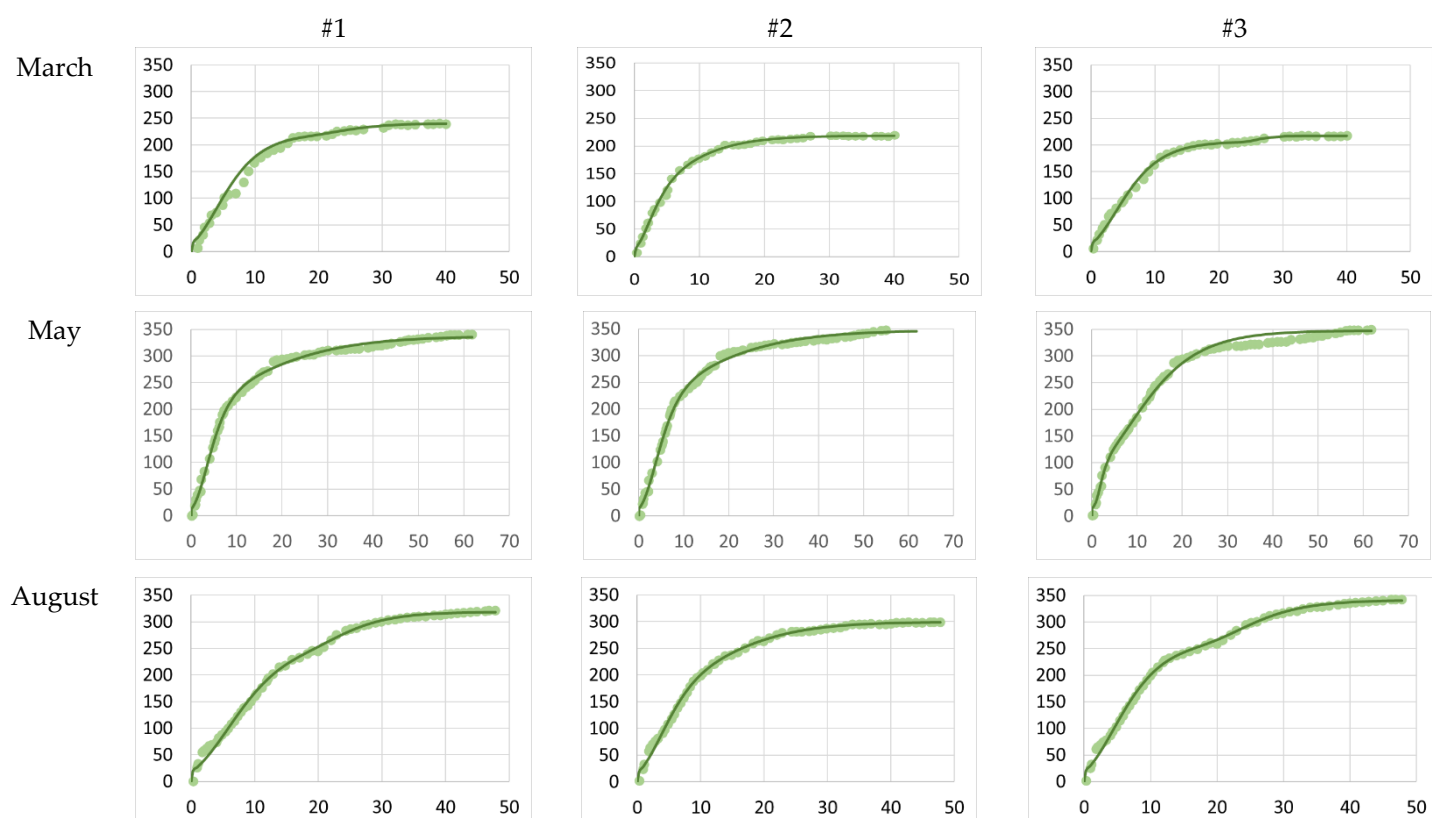

**Figure S2.** Replicate BMP curves of samples from tomato suckers. Dots: experimental methane yield expressed in NL kgVS<sup>-1</sup>, solid lines: TMG.

**Table S2.** Parameter values of the TMG fitted on BMP curves of samples from tomato suckers.

|        |    | A <sub>1</sub><br>(L kg <sup>-1</sup> VS) | λ <sub>1</sub><br>(d) | μ <sub>max1</sub><br>(L kg <sup>-1</sup> d <sup>-1</sup> ) | A <sub>2</sub><br>(L kg <sup>-1</sup> VS) | λ <sub>2</sub><br>(d) | μ <sub>max2</sub><br>(L kg <sup>-1</sup> d <sup>-1</sup> ) | R <sup>2</sup> | NSE  | PBIAS |
|--------|----|-------------------------------------------|-----------------------|------------------------------------------------------------|-------------------------------------------|-----------------------|------------------------------------------------------------|----------------|------|-------|
| March  | #1 | 222                                       | 0.0                   | 20.6                                                       | 19                                        | 19.3                  | 1.6                                                        | 0.998          | 1.00 | 0.20  |
|        | #2 | 137                                       | 0.0                   | 24.0                                                       | 81                                        | 1.7                   | 5.4                                                        | 0.999          | 1.00 | -0.04 |
|        | #3 | 207                                       | 0.0                   | 19.2                                                       | 10                                        | 24.3                  | 2.4                                                        | 0.998          | 1.00 | 0.29  |
| May    | #1 | 227                                       | 0.5                   | 29.3                                                       | 109                                       | 3.1                   | 3.4                                                        | 0.998          | 1.00 | -0.09 |
|        | #2 | 239                                       | 0.5                   | 26.9                                                       | 108                                       | 3.0                   | 3.4                                                        | 0.998          | 1.00 | -0.07 |
|        | #3 | 78                                        | 0.7                   | 26.6                                                       | 272                                       | 0.5                   | 11.9                                                       | 0.997          | 0.99 | -1.41 |
| August | #1 | 269                                       | 0.0                   | 17.2                                                       | 49                                        | 18.8                  | 3.7                                                        | 0.998          | 1.00 | 0.563 |
|        | #2 | 239                                       | 0.0                   | 23.3                                                       | 60                                        | 10.6                  | 3.2                                                        | 0.998          | 1.00 | 0.23  |
|        | #3 | 264                                       | 0.0                   | 22.2                                                       | 76                                        | 18.8                  | 5.2                                                        | 0.998          | 1.00 | 0.27  |

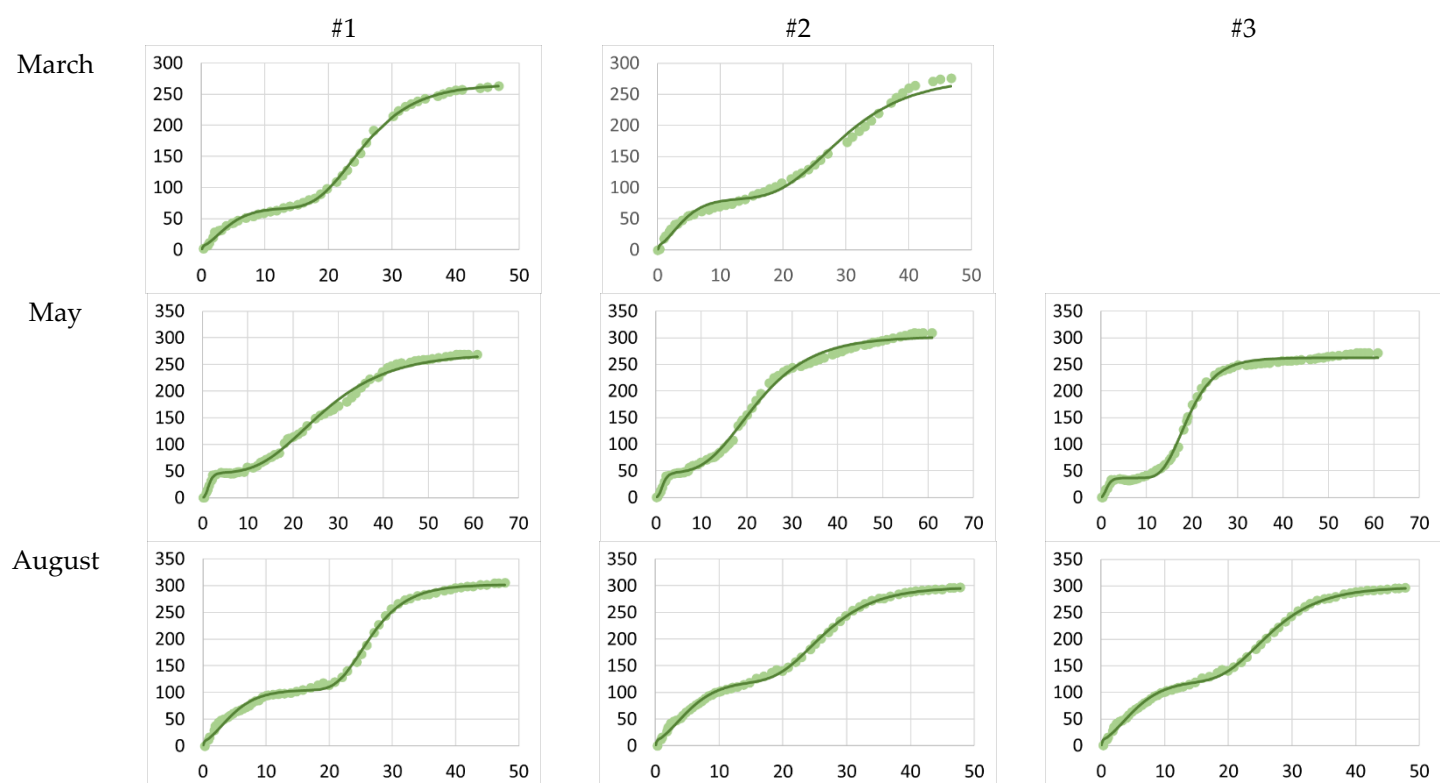

**Figure S3.** Replicate BMP curves of samples from cucumber leaves.  
Dots: experimental methane yield expressed in NL kgVS<sup>-1</sup>, solid lines: TMG.

**Table S3.** Parameter values of the TMG fitting the BMP curves of samples from cucumber leaves.

|        |    | A <sub>1</sub><br>(L kg <sup>-1</sup><br>VS) | λ <sub>1</sub><br>(d) | μ <sub>max1</sub><br>(L kg <sup>-1</sup> d <sup>-1</sup> ) | A <sub>2</sub><br>(L kg <sup>-1</sup><br>VS) | λ <sub>2</sub><br>(d) | μ <sub>max2</sub><br>(L kg <sup>-1</sup> d <sup>-1</sup> ) | R <sup>2</sup> | NSE  | PBIAS |
|--------|----|----------------------------------------------|-----------------------|------------------------------------------------------------|----------------------------------------------|-----------------------|------------------------------------------------------------|----------------|------|-------|
| March  | #1 | 67                                           | 0.0                   | 9.3                                                        | 199                                          | 17.9                  | 13.1                                                       | 0.999          | 1.00 | 0.09  |
|        | #2 | 83                                           | 0.0                   | 11.7                                                       | 193                                          | 19.1                  | 9.5                                                        | 0.996          | 0.99 | 1.19  |
| May    | #1 | 46                                           | 0.4                   | 25.9                                                       | 224                                          | 12.1                  | 7.9                                                        | 0.998          | 1.00 | 0.72  |
|        | #2 | 46                                           | 0.5                   | 23.2                                                       | 256                                          | 10.4                  | 11.1                                                       | 0.998          | 1.00 | 0.00  |
|        | #3 | 37                                           | 0.3                   | 19.0                                                       | 226                                          | 13.3                  | 19.8                                                       | 0.999          | 1.00 | -0.01 |
| August | #1 | 106                                          | 0.0                   | 12.8                                                       | 197                                          | 21.1                  | 18.0                                                       | 0.999          | 1.00 | 0.32  |
|        | #2 | 121                                          | 0.0                   | 13.0                                                       | 181                                          | 18.5                  | 11.2                                                       | 0.999          | 1.00 | 0.36  |
|        | #3 | 123                                          | 0.0                   | 12.8                                                       | 175                                          | 18.9                  | 11.6                                                       | 0.999          | 1.00 | 0.36  |

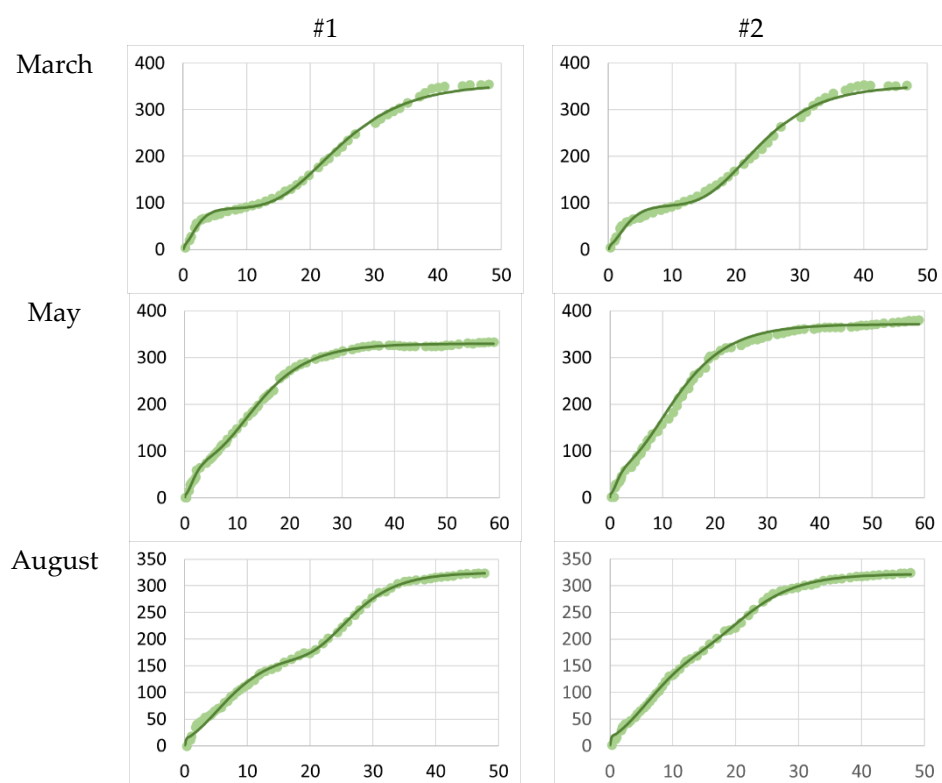

**Figure S4.** Replicate BMP curves of samples from cucumber suckers. Dots: experimental methane yield expressed in NL kgVS<sup>-1</sup>, solid lines: TGM.

**Table S4.** Parameter values of the TGM fitting the BMP curves of samples from cucumber suckers.

|        |    | A <sub>1</sub><br>(L kg <sup>-1</sup><br>VS) | λ <sub>1</sub><br>(d) | μ <sub>max1</sub><br>(L kg <sup>-1</sup> d <sup>-1</sup> ) | A <sub>2</sub><br>(L kg <sup>-1</sup><br>VS) | λ <sub>2</sub><br>(d) | μ <sub>max2</sub><br>(L kg <sup>-1</sup> d <sup>-1</sup> ) | R <sup>2</sup> | NSE  | PBIAS |
|--------|----|----------------------------------------------|-----------------------|------------------------------------------------------------|----------------------------------------------|-----------------------|------------------------------------------------------------|----------------|------|-------|
| March  | #1 | 89                                           | 0.0                   | 23.2                                                       | 266                                          | 14.4                  | 13.2                                                       | 0.998          | 1.00 | 0.69  |
|        | #2 | 95                                           | 0.0                   | 18.8                                                       | 257                                          | 14.8                  | 14.5                                                       | 0.998          | 0.99 | 1.03  |
| May    | #1 | 75                                           | 0.1                   | 24.2                                                       | 255                                          | 5.0                   | 14.2                                                       | 0.999          | 1.00 | -0.03 |
|        | #2 | 51                                           | 0.2                   | 22.0                                                       | 321                                          | 3.0                   | 17.1                                                       | 0.999          | 1.00 | -0.03 |
| August | #1 | 176                                          | 0.0                   | 12.7                                                       | 149                                          | 20.4                  | 11.2                                                       | 0.999          | 1.00 | 0.36  |
|        | #2 | 221                                          | 0.0                   | 13.7                                                       | 102                                          | 16.1                  | 6.9                                                        | 1.000          | 1.00 | -0.14 |

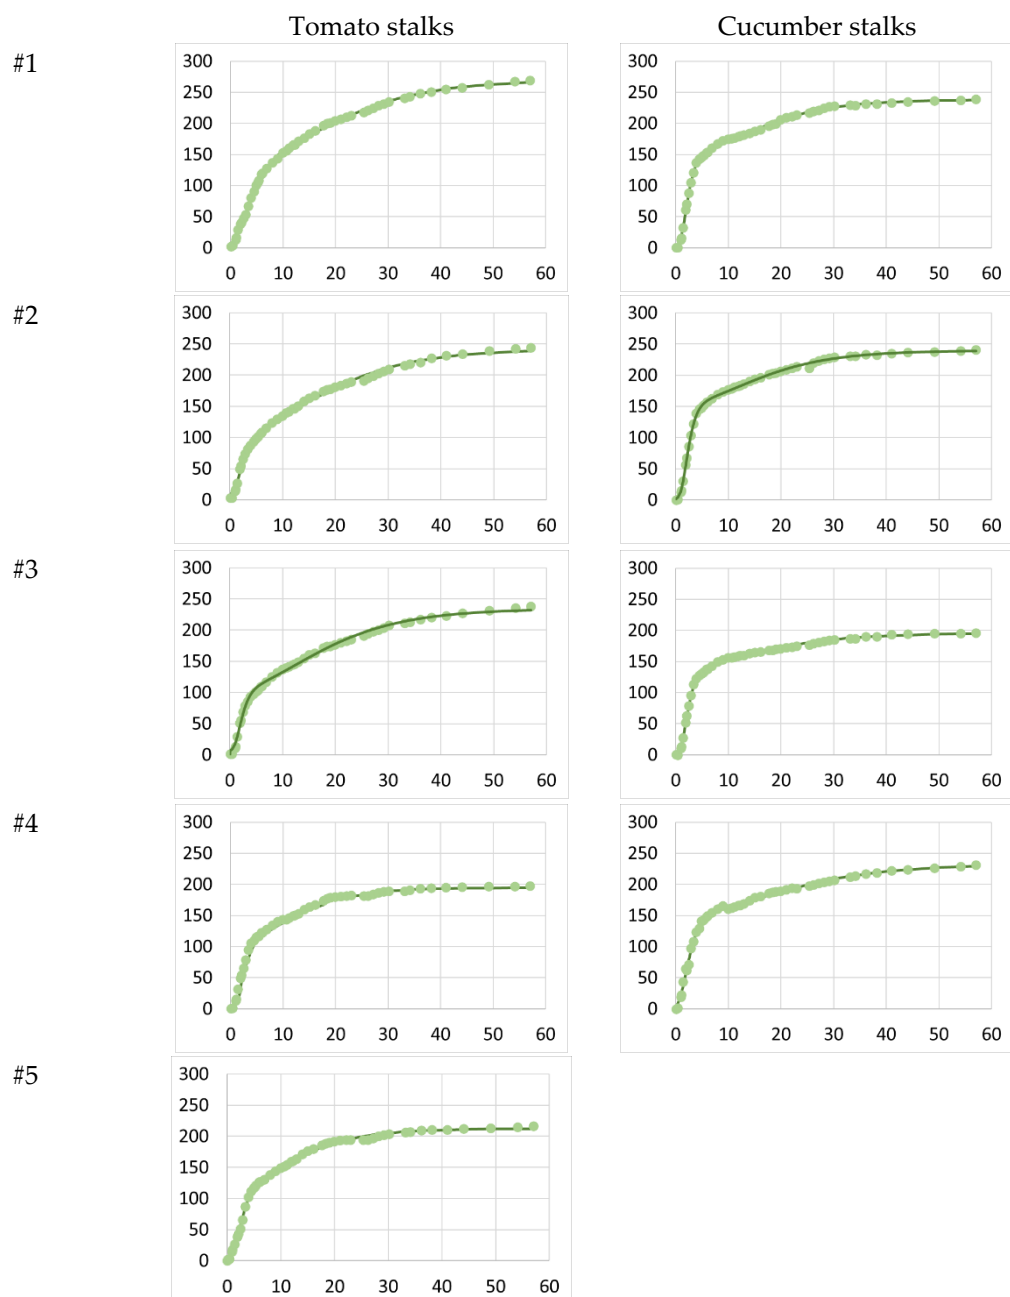

**Figure S5.** Replicate BMP curves of samples from tomato and cucumber stalks after removal of the whole plant. Dots: experimental methane yield expressed in NL gVS<sup>-1</sup>, solid lines: TGM.

**Table S5.** Parameter values of the TGM fitting the BMP curves of samples from tomato and cucumber stalks after removal of the whole plant.

|          |    | $A_1$<br>(L kg <sup>-1</sup> VS) | $\lambda_1$<br>(d) | $\mu_{max1}$<br>(L kg <sup>-1</sup> d <sup>-1</sup> ) | $A_2$<br>(L kg <sup>-1</sup> VS) | $\lambda_2$<br>(d) | $\mu_{max2}$<br>(L kg <sup>-1</sup> d <sup>-1</sup> ) | R <sup>2</sup> | NSE  | PBIAS |
|----------|----|----------------------------------|--------------------|-------------------------------------------------------|----------------------------------|--------------------|-------------------------------------------------------|----------------|------|-------|
| Tomato   | #1 | 134                              | 0.6                | 21.8                                                  | 136                              | 3.8                | 4.3                                                   | 0.999          | 1.00 | -0.10 |
|          | #2 | 93                               | 0.6                | 25.3                                                  | 149                              | 1.6                | 4.8                                                   | 0.998          | 1.00 | -0.20 |
|          | #3 | 92                               | 0.8                | 32.5                                                  | 142                              | 1.6                | 4.8                                                   | 0.999          | 1.00 | -0.22 |
|          | #4 | 111                              | 0.7                | 36.7                                                  | 84                               | 2.8                | 4.4                                                   | 0.999          | 1.00 | -0.06 |
|          | #5 | 109                              | 1.0                | 31.6                                                  | 103                              | 1.2                | 4.8                                                   | 0.999          | 1.00 | -0.02 |
| Cucumber | #1 | 148                              | 0.8                | 52.2                                                  | 90                               | 3.6                | 3.7                                                   | 1.000          | 1.00 | -0.07 |
|          | #2 | 150                              | 0.9                | 52.2                                                  | 90                               | 2.7                | 3.5                                                   | 1.000          | 1.00 | -0.08 |
|          | #3 | 134                              | 0.9                | 47.2                                                  | 61                               | 1.7                | 2.2                                                   | 0.999          | 1.00 | -0.12 |
|          | #4 | 150                              | 0.5                | 40.1                                                  | 82                               | 4.5                | 2.5                                                   | 0.999          | 1.00 | -0.10 |
